# Supplementary material for: Deciphering the evolutionary origin of the exceptional slow pace-of-life of marine endotherms
Source: Research Square preprint supplement (doi:10.21203/rs.3.rs-4863546/v1), 2024-09-13
Supplement: Supplementary file 1 [file ed0c6e69be5e198a5490c424.docx]

**SUPPLEMENTARY INFORMATION**

**Deciphering the evolutionary origin of the exceptional slow pace-of-life of marine endotherms**

Daniel Sol, Antón Prego, Laura Olivé, Meritxell Genovart, Daniel Oro & Antonio Hernandez-Matías

Corresponding author: Daniel Sol, daniel.sol@csic.es

**The pdf includes:**

Supplementary Methods

Figs. S1 to S26

Tables S1 to S6

**Supplementary Methods**

**Testing for accuracy of longevity data.** The use of maximum longevity data has been criticized because of its dependence on research effort1. To assess the importance of this potential bias, we assembled a large dataset of maximum lifespan for birds, taking advantage of a series of unique long-term capture-recapture schemes that have been operating in the last decades in different regions of the planet (e.g. USGS, EURING, ABBBS or SAFRING). We found information of 5542 longevity estimates for 2281species. We used these data to ask, first, whether variation across species in longevity was consistent within species, and hence amenable to be used in across-species comparisons. Within-species consistency was estimated as the Intraclass Correlation Coefficient (ICC) derived from a Gaussian mixed model using the R-package MCMCglmm2, with maximum longevity (log-transformed) as response variable and species as random effect. The ICC was estimated by dividing the variation estimated among species by the total variation (i.e. variation among species plus variation within species, the latter including natural variation and measurement error). We found that within-species consistency was very high, with an ICC = 0.893 (credibility interval = 0.875-0.909)(**Table S6**), supporting the assumption that maximum longevity is a species character.

Second, we asked whether part of this variation was accounted for phylogenetic relationships between species by estimating phylogenetic heritability is derived from a similar model but incorporating a phylogenetic similarity matrix as a Gaussian process. We found that substantial variation among species was attributed to phylogenetic effects, indicating that longevity is either highly conserved phylogenetically or that longevity estimations share similar biases among closely-related species. We found that a substantial part of variation across species is indeed explained by the phylogeny (**Table S6**).

Third, we disentangled direct phylogenetic effects from biases by restricting the analyses to data from long-term capture-recapture schemes, for which research effort (i.e. total number of recaptures per species) was available (sample size: 1963 longevity estimates of 1525 species). We found that even when research effort was significantly associated with longevity when included as fixed effect in the model (pMCMC = 0.0001), the effect size was weak (0.000003, CI = 0.000002-0.000004). Importantly, there remain substantial variation in longevity across species associated with phylogenetic relationships (**Table S6**).

Finally, we also present models for apparent survival for comparison. Apparent survival has been suggested to be more appropriate than maximum longevity to estimate longevity 1, but the paucity of data makes the approach less often used in comparative analyses. We extracted information on apparent survival from the recent global meta-analysis of from Scholer and collaborators3, which after matching with our phylogeny yielded 807 estimates of 636 species, and logit-transformed before the analyses. The results confirm that apparent survival is a species character, but also indicate that is not much better than maximum longevity in describing differences across species (**Table S6**).

Overall, our analyses confirm that our estimations of longevity are suitable for macroevolutionary analyses4.

1. Reinke, B. A. *et al.* Diverse aging rates in ectothermic tetrapods provide insights for the evolution of aging and longevity. *Science* **376**, 1459–1466 (2022).

2. Hadfield, J. D. MCMC Methods for Multi-Response Generalized Linear Mixed Models: The MCMCglmm R Package. *Journal Of Statistical Software* **33**, 1–22 (2010).

3. Scholer, M. N., Strimas-Mackey, M. & Jankowski, J. E. A meta-analysis of global avian survival across species and latitude. *Ecology letters* **23**, 1537–1549 (2020).

4. Healy, K. *et al.* Ecology and mode-of-life explain lifespan variation in birds and mammals. *Proceedings of the Royal Society B: Biological Sciences* **281**, 20140298–20140298 (2014).

**Supplementary Figures**

**Fig. S1: Stochastic character mapping reconstructing evolutionary transitions between marine, aquatic and terrestrial environments in birds.** The figure summarizes 500 reconstructions based on 100 randomly-selected phylogenies. Color codes: Marine = blue, Aquatic = orange and Terrestrial = grey.

**Fig. S2: Stochastic character mapping reconstructing evolutionary transitions between marine, aquatic and terrestrial environments in mammals.** The figure summarizes 500 reconstructions based on 100 randomly-selected phylogenies. Color codes: Marine = blue, Aquatic = orange and Terrestrial = grey.

**Fig. S3: Evolutionary transitions between marine, aquatic and terrestrial environments based on 500 stochastic character mappings integrated over 100 randomly-selected phylogenies.** Numbers are the average number of transitions with 95% confidence intervals in parenthesis. Bottom panels show transitions with marine environments split into coastal and pelagic.

**Fig. S4: Demographic validation of the fast-slow continuum for mammals (upper panels) and birds (bottom panels).** We used three metrics that are predicted to describe the fast-slow continuum: Life expectancy post-maturity, generation time (the mean number of years necessary for a cohort to replace itself) and elasticity in fecundity (the relative importance of a change in a demographic parameter for overall population growth. These metrics were derived from matrix population models from the COMADRE Animal Matrix Database ([*http://www.compadre-db.org*](http://www.compadre-db.org)), as reported in Hernández-Yáñez et al. 2022 and Healy et al. 2022. As expected, the fast–slow continuum co-varies positively with life expectancy post-maturity and generation time, and negatively with elasticity in fecundity. Sample sizes are 120 populations from 37 species for mammals and 333 populations from 35 species for birds.

**Fig. S5: Significance of the differences in life history among marine and non-marine birds and mammals across 100 phylogenies.** Life history traits (i.e. maximum longevity, incubation period and fecundity, all log-transformed) were compared between marine and non-marine species by means of a regularised phylogenetic multivariate analysis of variance (MANOVA) and covariance (i.e. including body size, log-transformed; MANCOVA). The model assumes a Brownian motion model of evolution, with measurement error estimated from the data as a nuisance parameter (error=TRUE). The histograms show the frequency distribution of *P*-values for these tests. The threshold of significance (*P* = 0.05) is shown in red (discontinuous line). In all cases, differences were statistically significant. All analyses are based on non-imputed data.

**Fig S6: Life history variation among marine, aquatic and terrestrial birds (A) and mammals (B).** All plots are based on non-imputed data.

**Fig S7: Significance of the differences in life history among marine and non-marine birds and mammals across 100 phylogenies accounting for confounds.** Life history traits (i.e. maximum longevity, incubation/gestation time and fecundity, all log-transformed) were compared between marine and non-marine species using a regularized phylogenetic multivariate analysis of variance (MANOVA) and covariance (i.e. including body size, log-transformed; MANCOVA). Trophic level, migratory behavior and tropical/temperate distribution were included as co-variates. The model assumes a Brownian motion model of evolution, with measurement error estimated from the data as a nuisance parameter (error=TRUE). The histograms show the frequency distribution of P-values for these tests. The threshold of significance (*P* = 0.05) is shown in red (discontinuous line). In all cases, differences were significant. All analyses are based on non-imputed data.

**Fig S8: Contour maps showing evolutionary changes in the fast-slow continuum for the major marine avian radiations.** Reconstructions are shown for Aequolitornithes (**A**), Charadriiformes (**B**) and Anseriformes (**C**). The histograms show the estimated values of the fast-slow continuum for the ancestor (red dot), estimated with the function fastAnc based on 100 phylogenies.

**Fig S9: Contour maps showing evolutionary changes in the fast-slow continuum for the major marine mammalian radiations.** Reconstructions are shown for Cetartiodactyla (**A**), Carnivora (**B**) and Sirenia (**C**)). The histograms show the estimated values of the fast-slow continuum for the ancestor (red dot), estimated with the function fastAnc based on 100 phylogenies.

**Fig S10: Fast-Slow optima (***θ***) estimated from OUMVs in Aequolitornithes** **for a sample of stochastic character mappings.**

**Fig S11: Fast-Slow optima (***θ***) estimated from OUMVs in Anseriformes** **for a sample of stochastic character mappings.**

**Fig S12: Fast-Slow optima (***θ***) estimated from OUMVs in Cetartiodactyla** **for a sample of stochastic character mappings.**

**Fig S13: Fast-Slow optima (***θ***) estimated from OUMVs in Carnivora** **for a sample of stochastic character mappings.**

**Fig S14: Fast-Slow optima (***θ***) estimated from OUMVs in Aequolitornithes** **for a sample of stochastic character mappings, splitting marine habitats in coastal and pelagic.**

**Fig S15. Optima (***θ***) for longevity, incubation and fecundity across environments for Aequolitornithes (A), Cetartiodactyla (B) and Carnivora (C).** Optima were estimated from OUMVs based on a sample of 100 stochastic character mappings. In Anseriformes, the OUMVs did not fit well the data and hence are not shown.

**Fig. S16: Fast-slow continuum and body size in mammals across habitats.** Marine species, both coastal and pelagic, are distinguished by more saturated colors. Representative species of the clades with the most extreme slow life histories are illustrated.

**Fig. S17: Fast-slow continuum and body size in birds across habitats.** Marine species, both coastal and pelagic, are distinguished by more saturated colors. Representative species of the clades with the most extreme slow life histories are illustrated.

**Fig. S18: Best path analysis models for marine Cetartiodactyla (cetaceans) estimated across 6 random-selected phylogenies.** Abbreviations: LO = Maximum longevity; BO = Body size; RBR = Relative brain size; STR = Streamlined body type; GE = Generation time.

**Fig. S19: Best path analysis models for odontocetes (marine Cetartiodactyla excluding Mysticetes), estimated across 6 random-selected phylogenies.** Abbreviations: LO = Maximum longevity; BO = Body size; RBR = Relative brain size; STR = Streamlined body type; GE = Generation time.

**Fig. S20: Life history as a function of encephalization, mobility and body size for marine Cetartiodactyla with different foraging strategies.**

**Fig. S21: Life history as a function of encephalization, mobility and body size for marine Cetartiodactyla with fasting and non-fasting strategies.** In fasting species, the mothers do not feed themselves and rely on their stored body fat to sustain them until the weaning process is complete.

**Fig. S22: Life history as a function of encephalization, mobility and body size for marine Cetartiodactyla with different social tendencies.**

**Fig. S23: Best path analysis models for marine Aequalithornites estimated across 6 random-selected phylogenies.** Abbreviations: LO = Maximum longevity; BO = Body size; RBR = Relative brain size; IN = Incubation time; WI = Hand-wing index.

**Fig. S24: Life history as a function of encephalization, mobility and body size for coastal and pelagic Aequalithornites.**

**Fig. S25: Life history as a function of encephalization, mobility and body size for marine Aequalithornites with different foraging strategies.**

**Fig. S26: Relationship between longevity and lifetime reproductive success (LRS) in marine birds.** LRS is measured as the coefficient of determination of a linear regression between maximum lifespan and number of chicks produced in a population. For mammals, no enough data was available (see Table S5 for source data).

**Supplementary Tables**

**Table S1. Number of species per order assigned to terrestrial, aquatic and marine (coastal or pelagic) habitats in birds (A) and mammals (B).** Orders containing marine species are in bold.

1. **Avian taxonomic orders**

|  | Terrestrial | Aquatic | Coastal | Pelagic |
| --- | --- | --- | --- | --- |
| Accipitriformes | 225 | 26 | 0 | 0 |
| Anseriformes | **4** | **138** | **17** | **1** |
| Apodiformes | 444 | 6 | 0 | 0 |
| Apterygiformes | 4 | 0 | 0 | 0 |
| Bucerotiformes | 66 | 0 | 0 | 0 |
| Caprimulgiformes | 108 | 6 | 0 | 0 |
| Cariamiformes | 2 | 0 | 0 | 0 |
| Casuariiformes | 4 | 0 | 0 | 0 |
| Charadriiformes | **84** | **164** | **89** | **30** |
| Ciconiiformes | 6 | 13 | 0 | 0 |
| Coliiformes | 6 | 0 | 0 | 0 |
| Columbiformes | 306 | 0 | 0 | 0 |
| Coraciiformes | 99 | 52 | 0 | 0 |
| Cuculiformes | 141 | 1 | 0 | 0 |
| Eurypygiformes | 2 | 0 | 0 | 0 |
| Falconiformes | 56 | 8 | 0 | 0 |
| Galliformes | 281 | 6 | 0 | 0 |
| Gaviiformes | **0** | **0** | **5** | **0** |
| Gruiformes | 82 | 74 | 0 | 0 |
| Leptosomiformes | 1 | 0 | 0 | 0 |
| Mesitornithiformes | 3 | 0 | 0 | 0 |
| Musophagiformes | 23 | 0 | 0 | 0 |
| Opisthocomiformes | 1 | 0 | 0 | 0 |
| Otidiformes | 24 | 1 | 0 | 0 |
| Passeriformes | 5809 | 157 | 0 | 0 |
| Pelecaniformes | **8** | **95** | **3** | **0** |
| Phaethontiformes | 0 | 0 | 0 | 3 |
| Phoenicopteriformes | 0 | 6 | 0 | 0 |
| Piciformes | 412 | 2 | 0 | 0 |
| Podicipediformes | **0** | **15** | **4** | **0** |
| Procellariiformes | **0** | **0** | **1** | **127** |
| Psittaciformes | 352 | 2 | 0 | 0 |
| Pteroclidiformes | 16 | 0 | 0 | 0 |
| Rheiformes | 2 | 0 | 0 | 0 |
| Sphenisciformes | **0** | **0** | **0** | **18** |
| Strigiformes | 203 | 2 | 0 | 0 |
| Struthioniformes | 1 | 0 | 0 | 0 |
| Suliformes | **0** | **11** | **26** | **15** |
| Tinamiformes | 47 | 0 | 0 | 0 |
| Trogoniformes | 43 | 0 | 0 | 0 |

1. **Mammalian taxonomic orders**

|  | Terrestrial | Aquatic | Coastal | Pelagic |
| --- | --- | --- | --- | --- |
| Afrosoricida | 51 | 4 | 0 | 0 |
| Carnivora | **236** | **14** | **43** | **2** |
| Cetartiodactyla | **222** | **25** | **5** | **78** |
| Cingulata | 20 | 0 | 0 | 0 |
| Dasyuromorphia | 74 | 0 | 0 | 0 |
| Dermoptera | 2 | 0 | 0 | 0 |
| Didelphimorphia | 96 | 1 | 0 | 0 |
| Diprotodontia | 147 | 0 | 0 | 0 |
| Eulipotyphla | 449 | 13 | 0 | 0 |
| Hyracoidea | 5 | 0 | 0 | 0 |
| Lagomorpha | 92 | 0 | 0 | 0 |
| Macroscelidea | 19 | 0 | 0 | 0 |
| Microbiotheria | 1 | 0 | 0 | 0 |
| Monotremata | 4 | 1 | 0 | 0 |
| Notoryctemorphia | 2 | 0 | 0 | 0 |
| Paucituberculata | 7 | 0 | 0 | 0 |
| Peramelemorphia | 22 | 0 | 0 | 0 |
| Perissodactyla | 11 | 5 | 0 | 0 |
| Pholidota | 8 | 0 | 0 | 0 |
| Pilosa | 10 | 0 | 0 | 0 |
| Primates | 438 | 0 | 0 | 0 |
| Proboscidea | 2 | 0 | 0 | 0 |
| Rodentia | 2211 | 62 | 0 | 0 |
| Scandentia | 20 | 0 | 0 | 0 |
| Sirenia | **0** | **1** | **2** | **2** |
| Tubulidentata | 1 | 0 | 0 | 0 |

**Table S2: Sample size and summary stastistics for life history traits in birds and mammals.** All traits are log-transformed except broods/litters per year. Abbreviations: Std. Dev. = Standard deviation; Pctl = percentile.

| **Life history traits, birds** | **N** | **Mean** | **Std. Dev.** | **Min** | **Pctl. 25** | **Pctl. 75** | **Max** |
| --- | --- | --- | --- | --- | --- | --- | --- |
| Maximum longevity | 2354 | 1.093 | 0.288 | 0.467 | 0.892 | 1.310 | 1.908 |
| Age first breeding | 1495 | 0.228 | 0.29 | -0.806 | 0.000 | 0.477 | 1.191 |
| Incubation time | 3845 | 1.279 | 0.173 | 0.929 | 1.146 | 1.402 | 1.920 |
| Fledging time | 3548 | 1.387 | 0.283 | 0.000 | 1.176 | 1.580 | 2.517 |
| Broods per year | 1606 | 1.436 | 1.608 | 0.333 | 1.000 | 1.750 | 52.000 |
| Clutch size | 6288 | 0.435 | 0.211 | 0000 | 0.301 | 0.590 | 1.365 |
| Fecundity | 1567 | 0.221 | 0.122 | 0000 | 0.157 | 0.295 | 1.412 |
|  |  |  |  |  |  |  |  |
| **Life history traits, mammals** | **N** | **Mean** | **Std. Dev.** | **Min** | **Pctl. 25** | **Pctl. 75** | **Max** |
| Maximum longevity | 2352 | 3.479 | 0.502 | 1.483 | 3.154 | 3.873 | 4.887 |
| Age first breeding | 1804 | 2.602 | 0.459 | 1.591 | 2.222 | 2.924 | 3.934 |
| Gestation time | 1954 | 1.796 | 0.421 | 1.000 | 1.433 | 2.208 | 2.826 |
| Weaning time | 1806 | 1.820 | 0.467 | 0.288 | 1.427 | 2.182 | 3.262 |
| Litters per year | 1788 | 0.181 | 0.292 | -0.921 | 0.000 | 0.398 | 1.000 |
| Litter size | 2886 | 2.896 | 1.883 | 0.900 | 1.07 | 4.000 | 16.89 |
| Fecundity | 1770 | 0.566 | 0.513 | -0.927 | 0.072 | 0.977 | 1.688 |

**Table S3: Results of the PCA to describe the fast-slow continuum (bold column).** The weights of the life history traits are given using both partially imputed data and actual available data.

| 1. Birds, imputed (N = 2192) | | |  |  |  |  |
| --- | --- | --- | --- | --- | --- | --- |
|  | **PC1** | PC2 | PC3 | PC4 | PC5 | PC6 |
| Maximum longevity | **0.350** | 0.408 | -0.145 | -0.792 | -0.243 | 0.055 |
| Age first breeding | **0.444** | 0.021 | -0.191 | -0.027 | 0.875 | -0.005 |
| Incubation time | **0.442** | 0.205 | -0.171 | 0.368 | -0.256 | -0.715 |
| Fledging time | **0.421** | 0.313 | -0.063 | 0.469 | -0.218 | 0.669 |
| Broods per year | **-0.267** | -0.004 | -0.864 | 0.038 | -0.060 | -0.005 |
| Clutch size | **-0.266** | 0.682 | 0.330 | 0.083 | 0.181 | -0.179 |
| Fecundity | **-0.407** | 0.478 | -0.232 | 0.095 | 0.162 | 0.079 |
|  |  |  |  |  |  |  |
| 1. Birds, available (N = 983) | | |  |  |  |  |
|  | **PC1** | PC2 | PC3 | PC4 | PC5 | PC6 |
| Maximum longevity | **0.347** | -0.346 | -0.313 | -0.789 | -0.186 | -0.057 |
| Age first breeding | **0.427** | -0.151 | 0.041 | 0.017 | 0.835 | 0.307 |
| Incubation time | **0.425** | -0.138 | -0.187 | 0.368 | 0.052 | -0.789 |
| Fledging time | **0.391** | -0.239 | -0.332 | 0.472 | -0.428 | 0.523 |
| Broods per year | **-0.263** | -0.805 | 0.343 | 0.104 | -0.022 | -0.068 |
| Clutch size | **-0.349** | 0.069 | -0.726 | 0.047 | 0.215 | -0.038 |
| Fecundity | **-0.416** | -0.358 | -0.332 | 0.074 | 0.185 | 0.027 |
|  |  |  |  |  |  |  |
| 1. Mammals, imputed (N = 3212) | | |  |  |  |  |
|  | **PC1** | PC2 | PC3 | PC4 | PC5 | PC6 |
| Maximum longevity | **0.365** | -0.094 | 0.775 | -0.241 | 0.404 | 0.188 |
| Age first breeding | **0.410** | -0.228 | 0.077 | 0.135 | -0.088 | -0.865 |
| Gestation time | **0.384** | 0.217 | 0.231 | 0.644 | -0.494 | 0.295 |
| Weaning time | **0.385** | -0.228 | -0.153 | -0.635 | -0.574 | 0.186 |
| Litters per year | **-0.378** | 0.390 | 0.436 | -0.228 | -0.427 | -0.224 |
| Litter size | **-0.287** | -0.823 | 0.161 | 0.231 | -0.169 | 0.156 |
| Fecundity | **-0.422** | -0.102 | 0.316 | -0.022 | -0.212 | -0.144 |
|  |  |  |  |  |  |  |
| 1. Mammals, available (N = 1283) | | |  |  |  |  |
|  | **PC1** | PC2 | PC3 | PC4 | PC5 | PC6 |
| Maximum longevity | **0.383** | 0.066 | -0.339 | -0.667 | 0.530 | -0.088 |
| Age first breeding | **0.398** | -0.232 | -0.154 | 0.009 | -0.204 | 0.850 |
| Gestation time | **0.380** | 0.236 | -0.537 | 0.075 | -0.611 | -0.358 |
| Weaning time | **0.372** | -0.206 | 0.677 | -0.423 | -0.374 | -0.194 |
| Litters per year | **-0.364** | 0.540 | 0.041 | -0.444 | -0.305 | 0.258 |
| Litter size | **-0.323** | -0.742 | -0.306 | -0.232 | -0.195 | -0.151 |
| Fecundity | **-0.418** | -0.027 | -0.141 | -0.345 | -0.182 | 0.121 |

**Table S4:** **Bi-variate OU models describing the co-evolution between the fast-slow and body size.** Values are the average AICc over a sample of 100 stochastic character mappings. Within parentheses, it is shown the percentage of times a model has the lowest AICc. The AICc of the most frequently selected models is shown in bold. Abbreviations: Aequol = Aequolitornithes, Anser = Anseriformes, Cetar = Cetartiodactyla and Carn = Carnivora.

| Model | Type | alpha | sigma | AICc Aequol | AICc Anser | AICc Cetar | AICc Carn |
| --- | --- | --- | --- | --- | --- | --- | --- |
| 1 | mvOUM | independent | independent | 1137.8  (0%) | 482.8  (0%) | 562.7  (0%) | 626.3  (0%) |
| 2 | mvOUM | independent | dependent | **1083.0** (58%) | 458.4  (2%) | 514.3  (1%) | 590.2  (0%) |
| 3 | mvOUM | dependent | independent | 1112.8  (3%) | **429.1**  (77%) | 525.2  (0%) | 581.6  (13%) |
| 4 | mvOUM | dependent | dependent | **1081.7**  (38%) | **428.8**  (21%) | **509.9**  (99%) | **577.3**  (87%) |

**Table S5: Effect of maximum breeding lifespan on lifetime reproductive success.** The effect is the coefficient of determination of a linear regression. Updated from Moreno (2000).

| **Latin name** | **Sex** | **Effect of breeding lifespan on LRS** | **Breeding lifespan (maximum)** | **Reference** |
| --- | --- | --- | --- | --- |
| Eudyptula minor | Male | 74 | 12 | a |
| Eudyptula minor | Female | 81 | 15 | a |
| Fulmarus glacialis | Male | 61 | 21 | b |
| Fulmarus glacialis | Female | 54 | 21 | b |
| Puffinus tenuirostris | both | 98 | 28 | c |
| Rissa tridactyla | Male | 83 | 20 | d |
| Rissa tridactyla | Female | 80 | 20 | d |
| Larus novaehollandiae | Male | 31 | 7 | e |
| Larus novaehollandiae | Female | 29 | 9 | e |
| Ptychoramphu aleuticus | both | 69 | 20 | f |
| Ursus maritimus | Male | 10 | 28 | g |
| Orcinus orca | Female | 46 | 37 | h |
| Sterna hirundo | Male | 61.2 | 23 | i |
| Sterna hirundo | Female | 60.6 | 23 | i |
| Mirounga angustirostris | both | 75 | 19 | j |

1. Dann, P. and J.M. Cullen. 1990. Survival, patterns of reproduction, and lifetime reproductive output in Little Blue Penguins (Eudyptula minor) on Phillip Island, Victoria, Australia. In: L.S. Davis and J.T. Darby (eds.), Penguin Biology, pp. 63-84. Academic Press, San Diego.
2. Ollason, J.C. and G.M. Dunnet. 1988. Variation in breeding success in fulmars. In: T.H. Clutton-Brock (ed.), Reproductive success:, pp. 263-278. Chicago University Press
3. Wooller, R.D., J.S. Bradley, I.J. Skira and D.L. Serventy. 1989. Short-tailed Shearwater. In: I. Newton (ed.), Lifetime Reproduction in Birds, pp. 405-417. Academic Press, London.
4. Coulson, J.C. 1988. Reproductive success of Kittiwake gulls, Rissa tridactyla. In: T.H. Clutton-Brock (ed.), Reproductive success, pp. 251-262. Chicago University Press, Chicago.
5. Mills, J.A. 1989. Red-billed Gull. In: I. Newton (ed.), Lifetime Reproduction in Birds, pp. 387-404. Academic Press, London
6. Johns, M. E., Warzybok, P., Bradley, R. W., Jahncke, J., Lindberg, M., & Breed, G. A. (2018). Increased reproductive investment associated with greater survival and longevity in Cassin’s auklets. Proceedings of the Royal Society B: Biological Sciences, 285(1885). https://doi.org/10.1098/rspb.2018.1464
7. Richardson, E. S., Davis, C., Stirling, I., Derocher, A. E., Lunn, N. J., & Malenfant, R. M. (2020). Variance in lifetime reproductive success of male polar bears. Behavioral Ecology, 31(5), 1224–1232. https://doi.org/10.1093/beheco/araa074
8. Weiss, M. N., Ellis, S., Franks, D. W., Nielsen, M. L. K., Cant, M. A., Johnstone, R. A., Ellifrit, D. K., Balcomb, K. C., & Croft, D. P. (2023). Costly lifetime maternal investment in killer whales. Current Biology, 33(4), 744-748.e3. https://doi.org/10.1016/j.cub.2022.12.057
9. Moiron, M., Charmantier, A., & Bouwhuis, S. (2022). The quantitative genetics of fitness in a wild seabird. Evolution, 76(7), 1443–1452. https://doi.org/10.1111/evo.14516
10. Costa, Daniel et al. (2023). Foraging strategies and lifetime fitness in northern elephant seals [Dataset]. Dryad.https://doi.org/10.7291/D1T685

**Table S6: Within-species consistency and phylogenetic heritability for longevity in birds.** Within-species consistency is the Intraclass Correlation Coefficient derived from a Gaussian mixed model (MCMCglmm) with maximum longevity (log-transformed) as response variable and species random effects, estimated by dividing the variation estimated among species by the total variation. Values close to 1 indicate high similarity between values from the same species. Phylogenetic heritability is derived from a similar model but incorporating a phylogenetic similarity matrix as a Gaussian process. Heritability is estimated as the fraction of total variation accounted for the phylogenetic distance between species. Values close to 1 indicate that closely-related species resemble each other in the trait studied, suggesting phylogenetically conservatism. Models are shown for the entire dataset, and the dataset restricted to longevity estimates derived from long-term banding programs with available information on research effort. For comparison, we also present models for apparent adult survival (logit-transformed). Abbreviation: HPD = 95% Posterior Density.

| Response variables | Predictors | Within species consistency | | | Phylogenetic heritability | | |
| --- | --- | --- | --- | --- | --- | --- | --- |
|  |  | **Estimate** | **Lower HPD** | **Upper HPD** | **Estimate** | **Lower HPD** | **Upper HPD** |
| Longevity, all data | *None* | 0.8933 | 0.8750 | 0.9098 | - | - | - |
| Longevity, all data | *None* | 0.0366 | 0.0105 | 0.0921 | 0.8644 | 0.8319 | 0.8996 |
| Longevity, restricted data | *None* | 0.7509 | 0.6750 | 0.7996 | - | - | - |
| Longevity, restricted data | *None* | 0.0018 | 0.0004 | 0.0236 | 0.6332 | 0.5470 | 0.7233 |
| Longevity, restricted data | *Research effort* | 0.4915 | 0.3925 | 0.5643 | - | - | - |
| Longevity, restricted data | *Research effort* | 0.0039 | 0.0005 | 0.0482 | 0.6509 | 0.5413 | 0.7184 |
| Apparent survival | *None* | 0.6938 | 0.6313 | 0.7481 | - | - | - |
| Apparent survival | *None* | 0.0013 | 0.0002 | 0.0806 | 0.7839 | 0.6930 | 0.8466 |
